# Supplementary material for: Plantagora: Modeling Whole Genome Sequencing and Assembly of Plant Genomes
Source: PLoS One. 2011 Dec 12;6(12):e28436. doi: 10.1371/journal.pone.0028436 (PMC3236183; doi:10.1371/journal.pone.0028436)
Supplement: Table S1 — Plantagora studies used a long list of different classes of metrics. In Table S1, the metrics are divided as they are in the MySQL database. The metrics include: Assembly metrics, or the statistics gathered during the assembly process and the main properties of the assembled sequences; and Accuracy metrics, or metrics derived by comparing the assembled sequences to the reference genome sequences. (XLS) [file pone.0028436.s002.xls]

## Sheet: Sheet1
Assembly Table	Column	Format	Example	Explanation
Assembly ID	1	Integer	5327	Number assigned to the represent the assembly entry.
Assembly Name	2	String	abyss-pe_50_NC_008394_454-R500-I0-C16_Illumina-R50-I2000-C24	Composed of the genome source, the datasets, assembler, and kmer setting.
Data Set ID A	3	String	454-R500-I0-C16	Composed of the platform, read size, paired end insert size, and coverage.
Data Set ID B	4	String	Illumina-R50-I500-C4	In most cases, two datasets are combined in an assembly.
Assembler	5	String	SOAP	The assembly software used to assemble the reads into contigs and scaffolds.
Assembler Parameters	6	String	-n 30 -j1	The settings used in running the software.
K-value	7	Integer	31	The Kmer setting used with the assembly software.
Processors Used	8	Integer	8	The number of processors or cores used to generate the assembly.
Runtime	9	Integer (Minutes)	159	The time it took to create the assembly.
Processor Time	10	Integer (Minutes)	102	The runtime X the number of processors used.
Max Memory Used	11	Integer (Mb)	5	Maximum memory needed during the course of the assembly.
Final Disk Space Used	12	Integer (Mb)	2	The final storage space needed for the assembly.
Contigs	13	Integer	11081	The number of contigs in the resulting assembly.
Total Contig Length	14	Integer (bp)	113007182	The sum of the lengths of all the contigs.
Average Contig Length	15	Integer (bp)	25822	The mean contig length.
Contig N50	16	Integer (bp)	54820	The contig size where 50% of the contigs are larger and 50% are smaller.
Largest Contig Length	17	Integer (bp)	128208	The maximum contig size for the assembly.
Contigs > 1000bp	18	Integer	5028	The number of contigs greater than 1000 bp.
Contigs > 5000bp	19	Integer	2382	The number of contigs greater than 5000 bp.
Scaffolds	20	Integer	552	The number of scaffolds (combined blocks of contigs) in the assembly.
Total Scaffold Length	21	Integer (bp)	114837184	The sum of the lengths of the scaffolds.
Average Scaffold Length	22	Integer (bp)	178302	The mean scaffold length.
Scaffold N50	23	Integer (bp)	1345098	The scaffold size where 50% of the contigs are larger and 50% are smaller.
Largest Scaffold Length	24	Integer (bp)	15002837	The maximum length of scaffold produced by the assembly.
Total Coverage	25	Integer (fold)	20	Total Reads/Genome Size.
Coverage Ratio	26	Integer/Integer	2010-01-04	Coverage A/Coverage B.
Insert Size A	27	Integer (bp)	2000	Number of Bases Between Paired Reads (inclusive) for Dataset A.
Insert Size B	28	Integer (bp)	8000	Number of Bases Between Paired Reads (inclusive) for Dataset B.
Platform Combination	29	String	454-Illumina	Platforms Used for Sequencing Datasets A & B.
Read Length Combination	30	Integer-Integer	75-75	Read Length A-Read Length B.
Accuracy Statistics Table
Accuracy/Region Statistics ID	1	Integer	41	ID assigned to the metrics produced by alignment of an assembly.
Assembly Name	2	String	newbler_NC_008394_454-R500-I0-C12_454-R500-I2000-C8	The numerical ID for the the assembly used in the analysis.
Genome Region ID	3	String	repeat_region	The portion of the reference genome that is analyzed for a specific entry.
Ambiguous Bases	4	Integer (bp)	173029	The number bases called as N.
Error Rate	5	Floating Point	0.00036	The total number of base errors (indel and mismatch) divided by the length of the reference.
Indel Rate	6	Floating Point	0.0003	The number of indels divided by the total number of bases in the specified reference.
Mismatch Rate	7	Floating Point	6e-05	The number of mismatches divided by the total number of bases in the specified reference.
Misassembly Rate	8	Floating Point	0.00014	The number of misassemblies divided by the length of the specified reference.
Misassembled Contigs	9	Integer	32	The number of contigs that contain misassembly events.
Misassembled Contig Bases	10	Integer (bp)	564928	The number of bases in contigs which contain misassemblies.
Internal Overlaps	11	Integer (bp)	2	The number of instances of internal overlap in all contigs.
Internal Gaps	12	Integer (bp)	5	The number of instances of internal gaps in all contigs.
Representation	13	Floating Point	0.90328	The portion of the genome that is represented in the assembly.
Number of Gaps	14	Integer (bp)	4369	The total number of gaps present between assembled contigs that align to the reference.
Number of Negative Gaps	15	Integer (bp)	500	The number of times that two contigs overlap on the reference.
Average Gap Size	16	Integer (bp)	723	The mean size of all the gaps in the assembly.
Average Negative Gap Size	17	Integer (bp)	-24	The mean size of all the negative gaps in the assembly.
Total Gap Bases	18	Integer (bp)	941409	Total number of bases in gaps in the assembly.
Number of Captured Gaps	19	Integer (bp)	1538	Captured gaps are gaps between two contigs linked via linking information.
Average Captured Gap Size	20	Integer (bp)	300	Mean size of all captured gaps in the assembly.
Total Captured Gap Bases	21	Integer (bp)	461400	Total number of bases in the assembly that are within captured gaps.
Unaligned Contigs	22	Integer (bp)	53	Contigs that had no alignment to the reference.
Unaligned Bases	23	Integer (bp)	87092	The total number of bases contained in unaligned contigs.
Ambiguously Aligned Contigs	24	Integer (bp)	2226	Contigs with reference alignments of equal quality in multiple locations on the reference.
Ambiguously Aligned Bases	25	Integer (bp)	106707	The number of bases contained in ambiguous contigs.
